# Supplementary material for: Mitochondrial-derived Peptide Single-nucleotide Polymorphisms Associated with Cardiovascular Complications in Type 2 Diabetes
Source: Preprints.org preprint supplement (doi:10.20944/preprints202210.0025.v1), 2022-10-05
Supplement: Supplementary file 1 [file supplementary]

|  | **Number of sequences** | **Population and group identified** | **References** |
| --- | --- | --- | --- |
|  | 7 | Italian  T2D | Achilli, A., et al. (2011). Mitochondrial DNA backgrounds might modulate diabetes complications rather than T2DM as a whole. PloS one, 6(6), e21029. [https://doi.org/10.1,371/journal.pone.0021029](https://doi.org/10.1371/journal.pone.0021029) |
| JF717361.1, JF717360.1, JF717359.1, JF717358.1, JF717357.1, JF717356.1 and JF717355.1. | | | |
|  | 64 | Finnish  T2D | Soini, H. K., Moilanen, J. S., Finnila, S., & Majamaa, K. (2012). Mitochondrial DNA sequence variation in Finnish patients with matrilineal diabetes mellitus. BMC research notes, 5, 350. [https://doi.org/10.1,186/1756-0500-5-350](https://doi.org/10.1186/1756-0500-5-350) |
| JX171140.1, JX171139.1, JX171138.1, JX171137.1, JX171136.1, JX171135.1, JX171134.1, JX171133.1, JX171132.1, JX171131.1, JX171130.1, JX171129.1, JX171128.1, JX171127.1, JX171126.1, JX171125.1, JX171124.1, JX171123.1, JX171122.1, JX171121.1, JX171120.1, JX171119.1, JX171118.1, JX171117.1, JX171116.1, JX171115.1, JX171114.1, JX171113.1, JX171112.1, JX171111.1, JX171110.1, JX171109.1, JX171108.1, JX171107.1, JX171106.1, JX171105.1, JX171104.1, JX171103.1, JX171102.1, JX171101.1, JX171100.1, JX171099.1, JX171098.1, JX171097.1, JX171096.1, JX171095.1, JX171094.1, JX171093.1, JX171092.1, JX171091.1, JX171090.1, JX171089.1, JX171088.1, JX171087.1, JX171086.1, JX171085.1, JX171084.1, JX171083.1, JX171082.1, JX171081.1, JX171080.1, JX171079.1, JX171078.1 and  JX171077.1. | | | |
|  | 96 | Japanese  T2D | Tanaka *et al.* (2004). Mitochondrial genome variation in eastern Asia and the peopling of Japan. Genome research, 14(10A), 1832–1850. [https://doi.org/10.1,101/gr.2286304](https://doi.org/10.1101/gr.2286304) |
| AP008824.1, AP008823.1, AP008822.1, AP008821.1, AP008820.1, AP008819.1, AP008818.1, AP008817.1, AP008816.1, AP008815.1, AP008814.1, AP008813.1, AP008812.1, AP008811.1, AP008810.1, AP008809.1, AP008808.1, AP008807.1, AP008806.1, AP008805.1, AP008804.1, AP008803.1, AP008802.1, AP008801.1, AP008800.1, AP008799.1, AP008798.1, AP008797.1, AP008796.1, AP008795.1, AP008794.1, AP008793.1, AP008792.1, AP008791.1, AP008790.1, AP008789.1, AP008787.1, AP008786.1, AP008785.1, AP008784.1, AP008783.1, AP008782.1, AP008781.1, AP008780.1, AP008779.1, AP008778.1, AP008777.1, AP008776.1, AP008775.1, AP008774.1, AP008773.1, AP008772.1, AP008771.1, AP008770.1, AP008769.1, AP008768.1, AP008767.1, AP008766.1, AP008765.1, AP008764.1, AP008763.1, AP008762.1, AP008761.1, AP008760.1, AP008759.1, AP008758.1, AP008757.1, AP008756.1, AP008755.1, AP008754.1, AP008753.1, AP008752.1, AP008751.1, AP008750.1, AP008749.1, AP008748.1, AP008747.1, AP008746.1, AP008745.1, AP008744.1, AP008743.1, AP008742.1, AP008741.1, AP008740.1, AP008739.1, AP008738.1, AP008737.1, AP008736.1, AP008735.1, AP008734.1, AP008733.1, AP008732.1, AP008731.1, AP008730.1 and AP008729.1. | | | |
|  | 33 | Japanese  controls | Tanaka *et al.* (2004). Mitochondrial genome variation in eastern Asia and the peopling of Japan. Genome research, 14(10A), 1832–1850. [https://doi.org/10.1,101/gr.2286304](https://doi.org/10.1101/gr.2286304) |
| AP008632.1, AP008631.1, AP008630.1, AP008628.1, AP008627.1, AP008626.1, AP008625.1, AP008624.1, AP008623.1, AP008622.1, AP008621.1, AP008620.1, AP008619.1, AP008618.1, AP008617.1, AP008616.1, AP008615.1, AP008614.1, AP008613.1, AP008612.1, AP008611.1, AP008610.1, AP008609.1, AP008608.1, AP008607.1, AP008606.1, AP008605.1, AP008604.1, AP008603.1, AP008602.1, AP008601.1, AP008600.1 and AP008599.1. | | | |
|  | | | |
|  |  |  |  |
|  |  |  |  |
|  | 76 | Taiwanese  T2D | Loo *et al.* (2014). Mitochondrial DNA association study of type 2 diabetes with or without ischemic stroke in Taiwan. BMC research notes, 7, 223. [https://doi.org/10.1,186/1756-0500-7-223](https://doi.org/10.1186/1756-0500-7-223) |
| KC252408.1, KC252409.1, KC252410.1, KC252411.1, KC252412.1, KC252413.1, KC252414.1, KC252415.1, KC252416.1, KC252417.1, KC252418.1, KC252419.1, KC252420.1, KC252422.1, KC252423.1, KC252424.1, KC252425.1, KC252426.1, KC252427.1, KC252428.1, KC252429.1, KC252430.1, KC252431.1, KC252432.1, KC252433.1, KC252434.1, KC252435.1, KC252436.1, KC252437.1, KC252438.1, KC252439.1, KC252440.1, KC252441.1, KC252442.1, KC252443.1, KC252444.1, KC252445.1, KC252446.1, KC252447.1, KC252449.1, KC252450.1, KC252451.1, KC252453.1, KC252454.1, KC252456.1, KC252457.1, KC252458.1, KC252459.1, KC252460.1, KC252461.1, KC252462.1, KC252463.1, KC252464.1, KC252465.1, KC252466.1, KC252467.1, KC252468.1, KC252469.1, KC252470.1, KC252472.1, KC252473.1, KC252474.1, KC252475.1, KC252476.1, KC252477.1, KC252478.1, KC252479.1, KC252480.1, KC252481.1, KC252482.1 and KC252483.1. | | | |
|  | 73 | Taiwanese  controls | Loo *et al.* (2014). Mitochondrial DNA association study of type 2 diabetes with or without ischemic stroke in Taiwan. BMC research notes, 7, 223. [https://doi.org/10.1,186/1756-0500-7-223](https://doi.org/10.1186/1756-0500-7-223) |
| KC252335.1, KC252336.1, KC252337.1, KC252338.1, KC252339.1, KC252340.1, KC252341.1, KC252342.1, KC252343.1, KC252344.1, KC252345.1, KC252346.1, KC252347.1, KC252348.1, KC252349.1, KC252350.1, KC252351.1, KC252352.1, KC252353.1, KC252354.1, KC252355.1, KC252356.1, KC252357.1, KC252358.1, KC252359.1, KC252360.1, KC252361.1, KC252362.1, KC252363.1, KC252364.1, KC252365.1, KC252366.1, KC252367.1, KC252368.1, KC252369.1, KC252370.1, KC252371.1, KC252372.1, KC252373.1, KC252374.1, KC252375.1, KC252376.1, KC252377.1, KC252378.1, KC252379.1, KC252380.1, KC252382.1, KC252383.1, KC252384.1, KC252385.1, KC252386.1, KC252387.1, KC252388.1, KC252389.1, KC252390.1, KC252391.1, KC252392.1, KC252393.1, KC252394.1, KC252395.1, KC252396.1, KC252397.1, KC252398.1, KC252399.1, KC252400.1, KC252401.1, KC252402.1, KC252403.1, KC252404.1, KC252405.1, KC252406.1 and KC252407.1. | | | |
|  | 1000 | Danish  T2D | Li *et al.* (2014). Variation and association to diabetes in 2000 full mtDNA sequences mined from an exome study in a Danish population. European journal of human genetics 22(8), 1040–1045. [https://doi.org/10.1,038/ejhg.2013.282](https://doi.org/10.1038/ejhg.2013.282) |
| KF161061, KF161062, KF161063, KF161064, KF161065, KF161066, KF161067, KF161068, KF161069, KF161070, KF161071, KF161072, KF161073, KF161074, KF161075, KF161076, KF161077, KF161078 ,KF161079, KF161080, KF161081, KF161082, KF161083, KF161084, KF161085, KF161086, KF161087, KF161088, KF161089, KF161090, KF161091, KF161092, KF161093, KF161094, KF161095, KF161096, KF161097, KF161098, KF161099, KF161100, KF161101, KF161102, KF161103, KF161104, KF161105, KF161106, KF161107, KF161108, KF161109, KF161110, KF161111, KF161112, KF161113, KF161114, KF161115, KF161116, KF161117, KF161118, KF161119, KF161120, KF161121, KF161122, KF161123, KF161124, KF161125, KF161126, KF161127, KF161128, KF161129, KF161130, KF161131, KF161132, KF161133, KF161134, KF161135, KF161136, KF161137, KF161138, KF161139, KF161140, KF161141, KF161142, KF161143, KF161144, KF161145, KF161146, KF161147, KF161148, KF161149, KF161150, KF161151, KF161152, KF161153, KF161154, KF161155, KF161156, KF161157, KF161158, KF161159, KF161160, KF161161, KF161162, KF161163, KF161164, KF161165, KF161166, KF161167, KF161168, KF161169, KF161170, KF161171, KF161172, KF161173, KF161174, KF161175, KF161176, KF161177, KF161178, KF161179, KF161180, KF161181, KF161182, KF161183, KF161184, KF161185, KF161186, KF161187, KF161188, KF161189, KF161190, KF161191, KF161192, KF161193, KF161194, KF161195, KF161196, KF161197, KF161198, KF161199, KF161200, KF161201, KF161202, KF161203, KF161204, KF161205, KF161206, KF161207, KF161208, KF161209, KF161210, KF161211, KF161212, KF161213, KF161214, KF161215, KF161216, ,KF161217, KF161218, KF161219, KF161220, KF161221, KF161222, KF161223, KF161224, KF161225, KF161226, KF161227, KF161228, KF161229, KF161230, KF161231, KF161232, KF161233, KF161234, KF161235, KF161236, KF161237, KF161238, KF161239, KF161240, KF161241, KF161242, KF161243, KF161244, KF161245, KF161246, KF161247, KF161248, KF161249, KF161250, KF161251, KF161252, KF161253, KF161254, KF161255, KF161256, KF161257, KF161258, KF161259, KF161260, KF161261, KF161262, KF161263, KF161264, KF161265, KF161266, KF161267, KF161268, KF161269, KF161270, KF161271, KF161272, KF161273, KF161274, KF161275, KF161276, KF161277, KF161278, KF161279, KF161280, KF161281, KF161282, KF161283, KF161284, KF161285, KF161286, KF161287, KF161288, KF161289, KF161290, KF161291, KF161292, KF161293, KF161294, KF161295, KF161296, KF161297, KF161298, KF161299, KF161300, KF161301, KF161302, KF161303, KF161304, KF161305, KF161306, KF161307, KF161308, KF161309, KF161310, KF161311, KF161312, KF161313, KF161314, KF161315, KF161316, KF161317, KF161318, KF161319, KF161320, KF161321, KF161322, KF161323, KF161324, KF161325, KF161326, KF161327, KF161328, KF161329, KF161330, KF161331, KF161332, KF161333, KF161334, KF161335, KF161336, KF161337, KF161338, KF161339, KF161340, KF161341, KF161342, KF161343, KF161344, KF161345, KF161346, KF161347, KF161348, KF161349, KF161350, KF161351, KF161352, KF161353, KF161354, KF161355, KF161356, KF161357, KF161358, KF161359, KF161360, KF161361, KF161362, KF161363, KF161364, KF161365, KF161366, KF161367, KF161368, KF161369, KF161370, KF161371, KF161372, KF161373, KF161374, KF161375, KF161376, KF161377, KF161378, KF161379, KF161380, KF161381, KF161382, KF161383, KF161384, KF161385, KF161386, KF161387, KF161388, KF161389, KF161390, KF161391, KF161392, KF161393, KF161394, KF161395, KF161396, KF161397, KF161398, KF161399, KF161400, KF161401, KF161402, KF161403, KF161404, KF161405, KF161406, KF161407, KF161408, KF161409, KF161410, KF161411, KF161412, KF161413, KF161414, KF161415, KF161416, KF161417, KF161418, KF161419, KF161420, KF161421, KF161422, KF161423, KF161424, KF161425 KF161426, KF161427, KF161428, KF161429, KF161430, KF161431, KF161432, KF161433, KF161434, KF161435, KF161436, KF161437, KF161438, KF161439, KF161440, KF161441, KF161442, KF161443, KF161444, KF161445 KF161446, KF161447, KF161448, KF161449, KF161450, KF161451, KF161452, KF161453, KF161454, KF161455, KF161456, KF161457, KF161458, KF161459, KF161460, KF161461, KF161462, KF161463, KF161464, KF161465, KF161466, KF161467, KF161468, KF161469, KF161470, KF161471, KF161478, KF161483, KF161486, KF161487, KF161492, KF161494, KF161500, KF161505, KF161507, KF161654, KF161683, KF161715, KF161724, KF161735, KF161738, KF161761, KF161786, KF161802, KF161840, KF161847, KF161859, KF161879, KF161896, KF161903, KF161924, KF161925, KF161926, KF161927, KF161928, KF161929, KF161930, KF161931, KF161932, KF161933, KF161934, KF161935, KF161936, KF161937, KF161938, KF161939, KF161940, KF161941, KF161942, KF161943, KF161944, KF161945, KF161946, KF161947, KF161948, KF161949, KF161950, KF161951, KF161952, KF161953, KF161954, KF161962, KF161963, KF161966, KF161967, KF161968, KF161969, KF161970, KF161971, KF161973, KF161974, KF161975, KF161976, KF161977, KF161978, KF161979, KF161980, KF161981, KF161982, KF161983, KF161984, KF161985, KF161986, KF161987, KF161988, KF161989, KF161990, KF161991, KF161992, KF161993, KF161994, KF161995, KF161996, KF161997, KF162001, KF162002, KF162003, KF162004, KF162005, KF162006, KF162007, KF162010, KF162012, KF162013, KF162014, KF162018, KF162019, KF162020, KF162021, KF162022, KF162023, KF162026, KF162027, KF162029 KF162030, KF162032, KF162033, KF162034, KF162035, KF162036, KF162037, KF162038, KF162039, KF162041, KF162043, KF162044, KF162045, KF162046, KF162047, KF162048, KF162050, KF162051, KF162052, KF162053, KF162054, KF162056, KF162057, KF162058, KF162060, KF162061, KF162063, KF162064, KF162066, KF162068, KF162071, KF162072, KF162073, KF162074, KF162075, KF162077, KF162078, KF162080, KF162081, KF162084, KF162085, KF162086, KF162087, KF162088, KF162089, KF162091, KF162092, KF162093, KF162094, KF162099, KF162100, KF162150, KF162195, KF162200, KF162201, KF162203, KF162204, KF162205, KF162206, KF162207, KF162209, KF162210, KF162212, KF162214, KF162219, KF162220, KF162222, KF162224, KF162225, KF162226, KF162227, KF162228, KF162229, KF162230, KF162231, KF162232, KF162233, KF162234, KF162235, KF162236, KF162237, KF162238, KF162239, KF162240, KF162241, KF162242, KF162243, KF162244, KF162245, KF162246, KF162247, KF162248, KF162249, KF162250, KF162251, KF162252, KF162253, KF162254, KF162256, KF162257, KF162258, KF162259, KF162260, KF162261, KF162262, KF162263, KF162264, KF162265, KF162266, KF162267, KF162268, KF162269, KF162270, KF162271, KF162272, KF162273, KF162274, KF162275, KF162276, KF162277, KF162278, KF162279, KF162280, KF162281, KF162282, KF162283, KF162284, KF162285, KF162286, KF162287, KF162288, KF162289, KF162290, KF162291 KF162292, KF162293, KF162294, KF162295, KF162296, KF162297, KF162298, KF162299, KF162300, KF162301, KF162302, KF162303, KF162304, KF162305, KF162306, KF162307, KF162308, KF162309, KF162310, KF162311, KF162312, KF162313, KF162314, KF162315, KF162316, KF162318, KF162319, KF162320, KF162321, KF162322, KF162323, KF162324, KF162325, KF162326, KF162327, KF162328, KF162329, KF162330, KF162331, KF162332, KF162333, KF162334, KF162335, KF162336, KF162338, KF162339, KF162340, KF162341, KF162342, KF162343, KF162344, KF162345, KF162346, KF162347, KF162348, KF162349, KF162350, KF162351, KF162352, KF162353, KF162354, KF162355, KF162356, KF162357, KF162358, KF162359, KF162360, KF162361, KF162362, KF162363, KF162364, KF162365, KF162366, KF162367, KF162368, KF162369, KF162370, KF162371, KF162372, KF162373, KF162374, KF162375, KF162376, KF162377, KF162378, KF162379, KF162380, KF162381, KF162382, KF162383, KF162384, KF162385, KF162386, KF162387, KF162388, KF162389, KF162390, KF162391, KF162392, KF162393, KF162394, KF162395, KF162396, KF162397, KF162398, KF162399, KF162400, KF162401, KF162402, KF162403, KF162404, KF162405, KF162406, KF162407, KF162408, KF162409, KF162410, KF162411, KF162412, KF162413, KF162414, KF162415, KF162416, KF162417, KF162418, KF162419, KF162420, KF162421, KF162422, KF162423, KF162424, KF162425, KF162426, KF162427, KF162428 KF162429, KF162430, KF162431, KF162432, KF162433, KF162434, KF162435, KF162436, KF162437, KF162438, KF162439, KF162440, KF162441, KF162442, KF162443, KF162444, KF162445 KF162446, KF162447, KF162448, KF162449, KF162450, KF162451, KF162452, KF162453, KF162455, KF162456, KF162458, KF162459, KF162460, KF162461, KF162462, KF162463, KF162464, KF162465, KF162466, KF162467, KF162468, KF162469, KF162470, KF162471, KF162472, KF162473, KF162474, KF162475, KF162476, KF162477, KF162478, KF162479, KF162480, KF162481, KF162482, KF162483, KF162484, KF162485, KF162486, KF162487, KF162488, KF162489, KF162490, KF162491, KF162492, KF162493, KF162494, KF162495, KF162496, KF162497, KF162498, KF162499, KF162500, KF162502, KF162503, KF162504, KF162505, KF162506, KF162507, KF162508, KF162509, KF162510, KF162511, KF162512, KF162513, KF162514, KF162515, KF162516, KF162517, KF162518, KF162519 KF162520, KF162521, KF162522, KF162523, KF162524, KF162525, KF162526, KF162527, KF162528, KF162529, KF162530, KF162531, KF162532, KF162533, KF162534, KF162535, KF162536, KF162537, KF162538, KF162539, KF162540, KF162541, KF162542, KF162543, KF162544, KF162545, KF162546, KF162547, KF162548, KF162549, KF162550, KF162551, KF162552, KF162553, KF162554, KF162555, KF162556, KF162557 KF162558, KF162559, KF162560, KF162561, KF162562, KF162563, KF162564, KF162565, KF162566, KF162567, KF162568, KF162569, KF162570, KF162571, KF162572, KF162573, KF162574, KF162575, KF162576, KF162577, KF162578, KF162579, KF162580, KF162581, KF162582, KF162583, KF162584, KF162585, KF162586, KF162587, KF162588, KF162589, KF162590, KF162591, KF162592, KF162593, KF162594, KF162595, KF162596, KF162597, KF162598, KF162599, KF162636, KF162640, KF162645, KF162650, KF162664, KF162684, KF162722, KF162728, KF162745, KF162755, KF162757, KF162786, KF162821, KF162830, KF162962, KF162989, KF163032, KF163033, KF163034, KF163035, KF163036, KF163037, KF163038, KF163039, KF163040, KF163041, KF163042, KF163043, KF163044, KF163045, KF163046, KF163047, KF163048, KF163049, KF163050, KF163051, KF163052, KF163053, KF163054, KF163055, KF163056, KF163057, KF163058 and KF163059. | | | |
|  | 1000 | Danish  Controls | Li *et al.* (2014). Variation and association to diabetes in 2000 full mtDNA sequences mined from an exome study in a Danish population. European journal of human genetics 22(8), 1040–1045. [https://doi.org/10.1,038/ejhg.2013.282](https://doi.org/10.1038/ejhg.2013.282) |
| KF161060, KF161472, KF161473, KF161474, KF161475, KF161476, KF161477, KF161479, KF161480, KF161481, KF161482, KF161484, KF161485, KF161488, KF161489, KF161490, KF161491, KF161493, KF161495, KF161496, KF161497, KF161498, KF161499, KF161501, KF161502, KF161503, KF161504, KF161506, KF161508, KF161509, KF161510, KF161511, KF161512, KF161513, KF161514, KF161515, KF161516, KF161517, KF161518, KF161519, KF161520, KF161521, KF161522, KF161523, KF161524, KF161525, KF161526, KF161527, KF161528, KF161529, KF161530, KF161531, KF161532, KF161533, KF161534, KF161535, KF161536, KF161537, KF161538, KF161539, KF161540, KF161541, KF161542, KF161543, KF161544, KF161545, KF161546, KF161547, KF161548 KF161549, KF161550, KF161551, KF161552, KF161553, KF161554, KF161555, KF161556, KF161557, KF161558, KF161559, KF161560, KF161561, KF161562, KF161563, KF161564, KF161565, KF161566, KF161567, KF161568 KF161569, KF161570, KF161571, KF161572, KF161573, KF161574, KF161575, KF161576, KF161577, KF161578, KF161579, KF161580, KF161581, KF161582, KF161583, KF161584, KF161585, KF161586, KF161587, KF161588, KF161589, KF161590, KF161591, KF161592, KF161593, KF161594, KF161595, KF161596, KF161597, KF161598, KF161599, KF161600, KF161601, KF161602, KF161603, KF161604, KF161605, KF161606, KF161607 KF161608, KF161609, KF161610, KF161611, KF161612, KF161613, KF161614, KF161615, KF161616, KF161617,, KF161618, KF161619, KF161620, KF161621, KF161622, KF161623, KF161624, KF161625, KF161626, KF161627, KF161628, KF161629, KF161630, KF161631, KF161632, KF161633, KF161634, KF161635, KF161636, KF161637, KF161638, KF161639, KF161640, KF161641, KF161642, KF161643, KF161644, KF161645, KF161646, KF161647, KF161648, KF161649, KF161650, KF161651, KF161652, KF161653, KF161655, KF161656, KF161657, KF161658, KF161659, KF161660, KF161661, KF161662, KF161663, KF161664, KF161665, KF161666, KF161667, KF161668, KF161669, KF161670, KF161671, KF161672, KF161673, KF161674, KF161675, KF161676, KF161677, KF161678, KF161679, KF161680, KF161681, KF161682, KF161684, KF161685, KF161686, KF161687, KF161688, KF161689, KF161690, KF161691, KF161692, KF161693, KF161694, KF161695, KF161696, KF161697, KF161698, KF161699, KF161700, KF161701, KF161702, KF161703, KF161704, KF161705, KF161706, KF161707, KF161708, KF161709, KF161710, KF161711, KF161712, KF161713, KF161714, KF161716 KF161717, KF161718, KF161719, KF161720, KF161721, KF161722, KF161723, KF161725, KF161726, KF161727, KF161728, KF161729, KF161730, KF161731, KF161732, KF161733, KF161734, KF161736, KF161737, KF161739, KF161740, KF161741, KF161742, KF161743, KF161744, KF161745, KF161746, KF161747, KF161748, KF161749, KF161750, KF161751, KF161752, KF161753, KF161754, KF161755, KF161756, KF161757, KF161758, KF161759, KF161760, KF161762, KF161763, KF161764, KF161765, KF161766, KF161767, KF161768, KF161769, KF161770, KF161771, KF161772, KF161773, KF161774, KF161775, KF161776, KF161777, KF161778, KF161779, KF161780, KF161781, KF161782, KF161783, KF161784, KF161785, KF161787, KF161788, KF161789, KF161790, KF161791, KF161792, KF161793, KF161794, KF161795, KF161796, KF161797, KF161798, KF161799, KF161800, KF161801, KF161803, KF161804, KF161805, KF161806, KF161807, KF161808, KF161809, KF161810, KF161811, KF161812, KF161813, KF161814, KF161815, KF161816, KF161817, KF161818, KF161819, KF161820, KF161821, KF161822, KF161823, KF161824, KF161825 KF161826, KF161827, KF161828, KF161829, KF161830, KF161831, KF161832 KF161833, KF161834, KF161835, KF161836, KF161837, KF161838, KF161839, KF161841, KF161842, KF161843, KF161844, KF161845, KF161846, KF161848, KF161849, KF161850, KF161851, KF161852, KF161853, KF161854, KF161855, KF161856, KF161857, KF161858, KF161860 KF161861, KF161862, KF161863, KF161864, KF161865, KF161866, KF161867, KF161868, KF161869, KF161870, KF161871, KF161872, KF161873, KF161874, KF161875, KF161876, KF161877, KF161878, KF161880, KF161881, KF161882, KF161883, KF161884, KF161885, KF161886, KF161887, KF161888, KF161889, KF161890, KF161891, KF161892, KF161893, KF161894, KF161895, KF161897, KF161898, KF161899, KF161900, KF161901, KF161902, KF161904, KF161905, KF161906, KF161907, KF161908, KF161909, KF161910, KF161911, KF161912, KF161913, KF161914, KF161915, KF161916, KF161917, KF161918, KF161919, KF161920, KF161921, KF161922, KF161923, KF161955, KF161956, KF161957, KF161958, KF161959 KF161960, KF161961, KF161964, KF161965, KF161972, KF161998, KF161999, KF162000, KF162008, KF162009, KF162011, KF162015, KF162016 KF162017, KF162024, KF162025, KF162028, KF162031, KF162040, KF162042, KF162049, KF162055, KF162059, KF162062, KF162065, KF162067, KF162069, KF162070 KF162076, KF162079, KF162082, KF162083, KF162090, KF162095, KF162096, KF162097, KF162098, KF162101 KF162102, KF162103, KF162104, KF162105, KF162106, KF162107, KF162108, KF162109, KF162110, KF162111, KF162112, KF162113, KF162114, KF162115, KF162116, KF162117, KF162118, KF162119, KF162120, KF162121, KF162122, KF162123, KF162124, KF162125, KF162126, KF162127, KF162128, KF162129, KF162130, KF162131, KF162132, KF162133, KF162134, KF162135, KF162136, KF162137, KF162138, KF162139, KF162140, KF162141, KF162142 KF162143, KF162144, KF162145, KF162146, KF162147, KF162148, KF162149, KF162151, KF162152, KF162153, KF162154, KF162155, KF162156, KF162157, KF162158, KF162159, KF162160, KF162161, KF162162, KF162163, KF162164, KF162165, KF162166, KF162167, KF162168 KF162169, KF162170, KF162171, KF162172, KF162173, KF162174, KF162175, KF162176, KF162177, KF162178, KF162179, KF162180, KF162181, KF162182, KF162183, KF162184, KF162185, KF162186, KF162187 KF162188, KF162189, KF162190, KF162191 KF162192, KF162193, KF162194, KF162196, KF162197, KF162198, KF162199, KF162202, KF162208, KF162211, KF162213, KF162215, KF162216, KF162217, KF162218, KF162221, KF162223, KF162255 KF162317, KF162337, KF162454, KF162457, KF162501, KF162600, KF162601, KF162602, KF162603, KF162604, KF162605, KF162606, KF162607, KF162608, KF162609 KF162610, KF162611, KF162612, KF162613, KF162614, KF162615, KF162616, KF162617, KF162618, KF162619, KF162620, KF162621, KF162622, KF162623, KF162624 KF162625, KF162626, KF162627, KF162628, KF162629, KF162630, KF162631, KF162632, KF162633 KF162634, KF162635, KF162637, KF162638, KF162639, KF162641, KF162642, KF162643, KF162644, KF162646, KF162647, KF162648, KF162649, KF162651, KF162652, KF162653, KF162654, KF162655, KF162656, KF162657, KF162658, KF162659, KF162660, KF162661, KF162662, KF162663, KF162665, KF162666, KF162667, KF162668, KF162669, KF162670, KF162671, KF162672, KF162673, KF162674, KF162675, KF162676, KF162677, KF162678, KF162679, KF162680, KF162681, KF162682, KF162683, KF162685 KF162686, KF162687, KF162688, KF162689, KF162690, KF162691, KF162692, KF162693, KF162694, KF162695, KF162696, KF162697, KF162698, KF162699, KF162700, KF162701, KF162702, KF162703, KF162704, KF162705, KF162706, KF162707, KF162708, KF162709, KF162710, KF162711, KF162712, KF162713, KF162714, KF162715, KF162716, KF162717, KF162718, KF162719, KF162720, KF162721, KF162723, KF162724, KF162725, KF162726, KF162727, KF162729, KF162730, KF162731, KF162732, KF162733, KF162734, KF162735, KF162736, KF162737, KF162738, KF162739 KF162740, KF162741, KF162742, KF162743, KF162744, KF162746, KF162747, KF162748, KF162749, KF162750, KF162751, KF162752, KF162753, KF162754, KF162756, KF162758, KF162759, KF162760, KF162761, KF162762, KF162763, KF162764, KF162765, KF162766, KF162767, KF162768, KF162769, KF162770, KF162771, KF162772, KF162773, KF162774, KF162775, KF162776, KF162777, KF162778, KF162779, KF162780, KF162781, KF162782, KF162783, KF162784, KF162785, KF162787, KF162788, KF162789, KF162790, KF162791, KF162792, KF162793, KF162794, KF162795, KF162796, KF162797, KF162798, KF162799, KF162800, KF162801 KF162802, KF162803, KF162804, KF162805, KF162806, KF162807, KF162808, KF162809, KF162810, KF162811, KF162812 KF162813, KF162814, KF162815, KF162816, KF162817, KF162818, KF162819, KF162820, KF162822, KF162823, KF162824, KF162825, KF162826, KF162827, KF162828, KF162829, KF162831, KF162832, KF162833, KF162834, KF162835, KF162836, KF162837, KF162838, KF162839, KF162840, KF162841, KF162842, KF162843, KF162844, KF162845, KF162846, KF162847, KF162848, KF162849, KF162850, KF162851, KF162852, KF162853, KF162854, KF162855, KF162856, KF162857, KF162858, KF162859, KF162860, KF162861, KF162862, KF162863, KF162864, KF162865, KF162866 KF162867, KF162868, KF162869, KF162870, KF162871, KF162872, KF162873, KF162874, KF162875, KF162876, KF162877, KF162878 KF162879, KF162880, KF162881, KF162882, KF162883, KF162884, KF162885, KF162886, KF162887, KF162888 KF162889, KF162890, KF162891, KF162892, KF162893, KF162894, KF162895, KF162896, KF162897, KF162898, KF162899, KF162900, KF162901, KF162902, KF162903, KF162904 KF162905, KF162906, KF162907, KF162908, KF162909, KF162910, KF162911, KF162912, KF162913, KF162914, KF162915, KF162916, KF162917, KF162918, KF162919, KF162920, KF162921, KF162922, KF162923, KF162924, KF162925, KF162926, KF162927, KF162928, KF162929, KF162930, KF162931, KF162932, KF162933 KF162934, KF162935, KF162936, KF162937, KF162938, KF162939, KF162940, KF162941, KF162942, KF162943, KF162944, KF162945, KF162946, KF162947, KF162948, KF162949, KF162950, KF162951, KF162952, KF162953, KF162954, KF162955, KF162956, KF162957, KF162958, KF162959, KF162960, KF162961, KF162963, KF162964, KF162965, KF162966, KF162967, KF162968, KF162969, KF162970, KF162971, KF162972, KF162973, KF162974, KF162975, KF162976, KF162977, KF162978, KF162979, KF162980, KF162981, KF162982, KF162983, KF162984, KF162985, KF162986, KF162987, KF162988, KF162990, KF162991, KF162992, KF162993, KF162994, KF162995, KF162996, KF162997, KF162998, KF162999, KF163000, KF163001, KF163002, KF163003, KF163004, KF163005, KF163006, KF163007, KF163008, KF163009, KF163010, KF163011, KF163012, KF163013, KF163014, KF163015, KF163016, KF163017, KF163018, KF163019, KF163020, KF163021, KF163022, KF163023, KF163024, KF163025, KF163026, KF163027, KF163028, KF163029, KF163030 and KF163031. | | | |
|  | 19 | India  T2D | Santhini,E., Vijaya Padma,V., Govindharaj,P., Sarveshwaran,V., Mohana Krishnan,L., Vijaya Kumar,K., Lalji,S. and Thangaraj,K. Mitochondrial COI and COII mutations in the type 2 diabetes patients with nephropathy. Unpublished.  Santhini,E., Vijaya Padma,V., Govindharaj,P., Sarveshwaran,V., Mohana Krishnan,L., Vijaya Kumar,K., Lalji,S. Thangaraj,K. Direct Submission, submitted (14-NOV-2010) Biotechnology, Bharathiar University, Maruthamalai Main Road, Coimbatore, Tamil Nadu 641046, India.  Vijaya Padma, V., Anitha, S., Santhini, E., Pradeepa, D., Tresa, D., Ganesan, P., Ishwarya, P., & Balamurugan, R. (2010). Mitochondrial and nuclear gene mutations in the type 2 diabetes patients of Coimbatore population. Molecular and cellular biochemistry, 345(1-2), 223–229. [https://doi.org/10.1,007/s11010-010-0576-5](https://doi.org/10.1007/s11010-010-0576-5) |
| HQ610991.1, HQ610985.1, HQ610984.1, HQ610982.1, HQ610981.1, HQ610978.1, HQ610975.1, HQ610974.1, HQ610972.1, HQ610966.1, HQ610960.1, HQ610955.1, HQ610950.1, HQ610945.1, HQ610942.1, HQ610938.1, HQ610934.1, HQ610933.1 and HQ610932.1. | | | |
|  | 5 | Indonesia  T2D | Maksum,I.P., Noer,A.S., Suprijana,O., Natradisastra,G. Nuswantara,S. Mitochondrial genome variation in maternally inherited diabetes patients from Indonesia. Unpublished  Maksum,I.P., Noer,A.S., Suprijana,O., Natradisastra,G. Nuswantara,S. Mitochondrial genome variation in pure cataract patients from Indonesia. Unpublished.  Maksum,I.P., Noer,A.S., Suprijana,O., Natradisastra,G. Nuswantara,S.  Direct Submission NCBI nucleotide database Submitted (01-JUN-2010) Chemistry, Universitas Padjadjaran, Singaperbangsa No. 2, Bandung, West Java 40132, Indonesia. |
| HM436820.1, HM436819.1, HM436817.1, HM436816.1 and HM436814.1. | | | |
