# Supplementary material for: Mitochondrial-derived Peptide Single-nucleotide Polymorphisms Associated with Cardiovascular Complications in Type 2 Diabetes
Source: Preprints.org preprint supplement (doi:10.20944/preprints202210.0025.v1), 2022-10-05
Supplement: Supplementary file 2 [file supplementary]

Archive with 7 entries (7 files):
- Supplementary Figure S1. Methodology and bioinformatics pipeline.pdf
- Table supplementary S1. Variants and related references_FINAL.docx
- Table supplementary S2.  Haplogroup H analysis.docx
- Table supplementary S3.  Haplogroup U analysis.docx
- Table supplementary S4. Haplogroup T analysis.docx
- Table supplementary S5. Haplogroups X,Y and Z analysis.docx
- Table supplementary S6. Polymorphisms comparative analysis.docx
