# Supplementary material for: Mitochondrial-derived Peptide Single-nucleotide Polymorphisms Associated with Cardiovascular Complications in Type 2 Diabetes
Source: Preprints.org preprint supplement (doi:10.20944/preprints202210.0025.v1), 2022-10-05
Supplement: Supplementary file 2 [file supplementary › Table supplementary S2. Haplogroup H analysis.docx]

| **Haplogroup h Subclades** | **[ALL]  N=945 (100%)** | **Controls  N=443 (46.87%)** | **T2DM  N=502 (53.12%)** |
| --- | --- | --- | --- |
| H(H) | 40 (4.23) | 20 (4.51) | 20 (3.98) |
| H1 | 380 (40.21) | 186 (41.99) | 194 (38.65) |
| H2 | 92 (9.74) | 29 (6.55) | 63 (12.55) |
| H3 | 50 (5.29) | 21 (4.74) | 29 (5.78) |
| H4 | 11 (1.16) | 4 (0.90) | 7 (1.39) |
| H5 | 63 (6.67) | 33 (7.45) | 30 (5.98) |
| H6 | 55 (5.82) | 28 (6.32) | 27 (5.38) |
| H7 | 41 (4.34) | 20 (4.51) | 21 (4.18) |
| H9 | 1 (0.11) | 0 (0.00) | 1 (0.20) |
| H10 | 18 (1.90) | 11 (2.48) | 7 (1.39) |
| H11 | 20 (2.12) | 8 (1.81) | 12 (2.39) |
| H12 | 0 (0.00) | 0 (0.00) | 0 (0.00) |
| H13 | 30 (3.17) | 16 (3.61) | 14 (2.79) |
| H14 | 0 (0.00) | 0 (0.00) | 0 (0.00) |
| H15 | 10 (1.06) | 6 (1.35) | 4 (0.80) |
| H16 | 18 (1.90) | 9 (2.03) | 9 (1.79) |
| H17 | 12 (1.27) | 5 (1.13) | 7 (1.39) |
| H18 | 11 (1.16) | 6 (1.35) | 5 (1.00) |
| H20 | 1 (0.11) | 1(0.23) | 0 (0.00) |
| H23 | 2 (0.21) | 1(0.23) | 1 (0.20) |
| H24 | 14 (1.48) | 5 (1.13) | 9 (1.79) |
| H26 | 10 (1.06) | 4 (0.90) | 6 (1.20) |
| H27 | 11 (1.16) | 6 (1.35) | 5 (1.00) |
| H28 | 3 (0.32) | 0 (0.00) | 3 (0.60) |
| H31 | 6 (0.63) | 1(0.23) | 5 (1.00) |
| H35 | 1 (0.11) | 1(0.23) | 0 (0.00) |
| H36 | 8 (0.85) | 4 (0.90) | 4 (0.80) |
| H39 | 2 (0.21) | 1(0.23) | 1 (0.20) |
| H41 | 1 (0.11) | 0 (0.00) | 1 (0.20) |
| H42 | 6 (0.63) | 2 (0.45) | 4 (0.80) |
| H44 | 1 (0.11) | 1(0.23) | 0 (0.00) |
| H45 | 2 (0.21) | 0 (0.00) | 2 (0.40) |
| H48 | 1 (0.11) | 1(0.23) | 0 (0.00) |
| H49 | 5 (0.53) | 3 (0.68) | 2 (0.40) |
| H50 | 1 (0.11) | 0 (0.00) | 1 (0.20) |
| H52 | 2 (0.21) | 1(0.23) | 1 (0.20) |
| H55 | 1 (0.11) | 0 (0.00) | 1 (0.20) |
| H56 | 3 (0.32) | 2 (0.45) | 1 (0.20) |
| H58 | 1 (0.11) | 0 (0.00) | 1 (0.20) |
| H59 | 3 (0.32) | 1(0.23) | 2 (0.40) |
| H61 | 1 (0.11) | 1(0.23) | 0 (0.00) |
| H64 | 1 (0.11) | 1(0.23) | 0 (0.00) |
| H75 | 1 (0.11) | 1(0.23) | 0 (0.00) |
| H86 | 2 (0.21) | 1(0.23) | 1 (0.20) |
| H87 | 1 (0.11) | 0 (0.00) | 1 (0.20) |
| H104 | 1 (0.11) | 1(0.23) | 0 (0.00) |
| H105 | 1 (0.11) | 1(0.23) | 0 (0.00) |
