# Supplementary material for: Mitochondrial-derived Peptide Single-nucleotide Polymorphisms Associated with Cardiovascular Complications in Type 2 Diabetes
Source: Preprints.org preprint supplement (doi:10.20944/preprints202210.0025.v1), 2022-10-05
Supplement: Supplementary file 2 [file supplementary › Table supplementary S3. Haplogroup U analysis.docx]

| **Haplogroup U Subclades** | **[ALL]  N=311 (100%)** | **Controls  N=150 (48.2%)** | **T2DM  N=161 (51.7%)** |
| --- | --- | --- | --- |
| U1 | 1 (0.32) | 0 (0.00) | 1 (0.62) |
| U2 | 35 (11.25) | 17 (11.33) | 18 (11.18) |
| U3 | 19 (6.11) | 7 (4.67) | 12 (7.45) |
| U4 | 63 (20.26) | 36 (24.00) | 27 (16.77) |
| U5 | 180 (57.88) | 80 (53.33) | 100 (62.11) |
| U6 | 2 (0.64) | 1 (0.67) | 1 (0.62) |
| U7 | 4 (1.29) | 3 (2.00) | 1 (0.62) |
| U8 | 7 (2.25) | 6 (4.00) | 1 (0.62) |
