# Supplementary material for: Mitochondrial-derived Peptide Single-nucleotide Polymorphisms Associated with Cardiovascular Complications in Type 2 Diabetes
Source: Preprints.org preprint supplement (doi:10.20944/preprints202210.0025.v1), 2022-10-05
Supplement: Supplementary file 2 [file supplementary › Table supplementary S4. Haplogroup T analysis.docx]

| **Haplogroup T Subclades** | **[ALL]  N=211 (100%)** | **Controls  N=103 (48.81%)** | **T2DM  N=108 (51.18%)** |
| --- | --- | --- | --- |
| T1 | 45 (21.32) | 22 (21.36) | 23 (21.30) |
| T2 | 166 (78.67) | 81 (78.64) | 85 (78.70) |
