# Supplementary material for: Mitochondrial-derived Peptide Single-nucleotide Polymorphisms Associated with Cardiovascular Complications in Type 2 Diabetes
Source: Preprints.org preprint supplement (doi:10.20944/preprints202210.0025.v1), 2022-10-05
Supplement: Supplementary file 2 [file supplementary › Table supplementary S5. Haplogroups X,Y and Z analysis.docx]

| **Haplogroups X,Y and Z Subclades** | **[ALL] N=33 (100%)** | **Controls N=10 (30.30%)** | **T2DM N=23 (69.70%)** |
| --- | --- | --- | --- |
| **Haplogroup X** |  |  |  |
| X2 | 1 (3.03) | 0 (0.00) | 1 (4.35) |
| X2b | 12 (36.36) | 3 (30.00) | 9 (39.13) |
| X2c | 16 (48.48) | 6 (60.00) | 10 (43.48) |
| X2l | 1 (3.03) | 0 (0.00) | 1 (4.35) |
| X2m | 1 (3.03) | 1 (10.00) | 0 (0.00) |
| **Haplogroup Y** |  |  |  |
| Y2b | 1 (3.03) | 0 (0.00) | 1 (4.35) |
| **Haplogroup Z** |  |  |  |
| Z2 | 1 (3.03) | 0 (0.00) | 1 (4.35) |
