# Supplementary figures and images for: Mitochondrial-derived Peptide Single-nucleotide Polymorphisms Associated with Cardiovascular Complications in Type 2 Diabetes
Source: Preprints.org preprint supplement (doi:10.20944/preprints202210.0025.v1), 2022-10-05

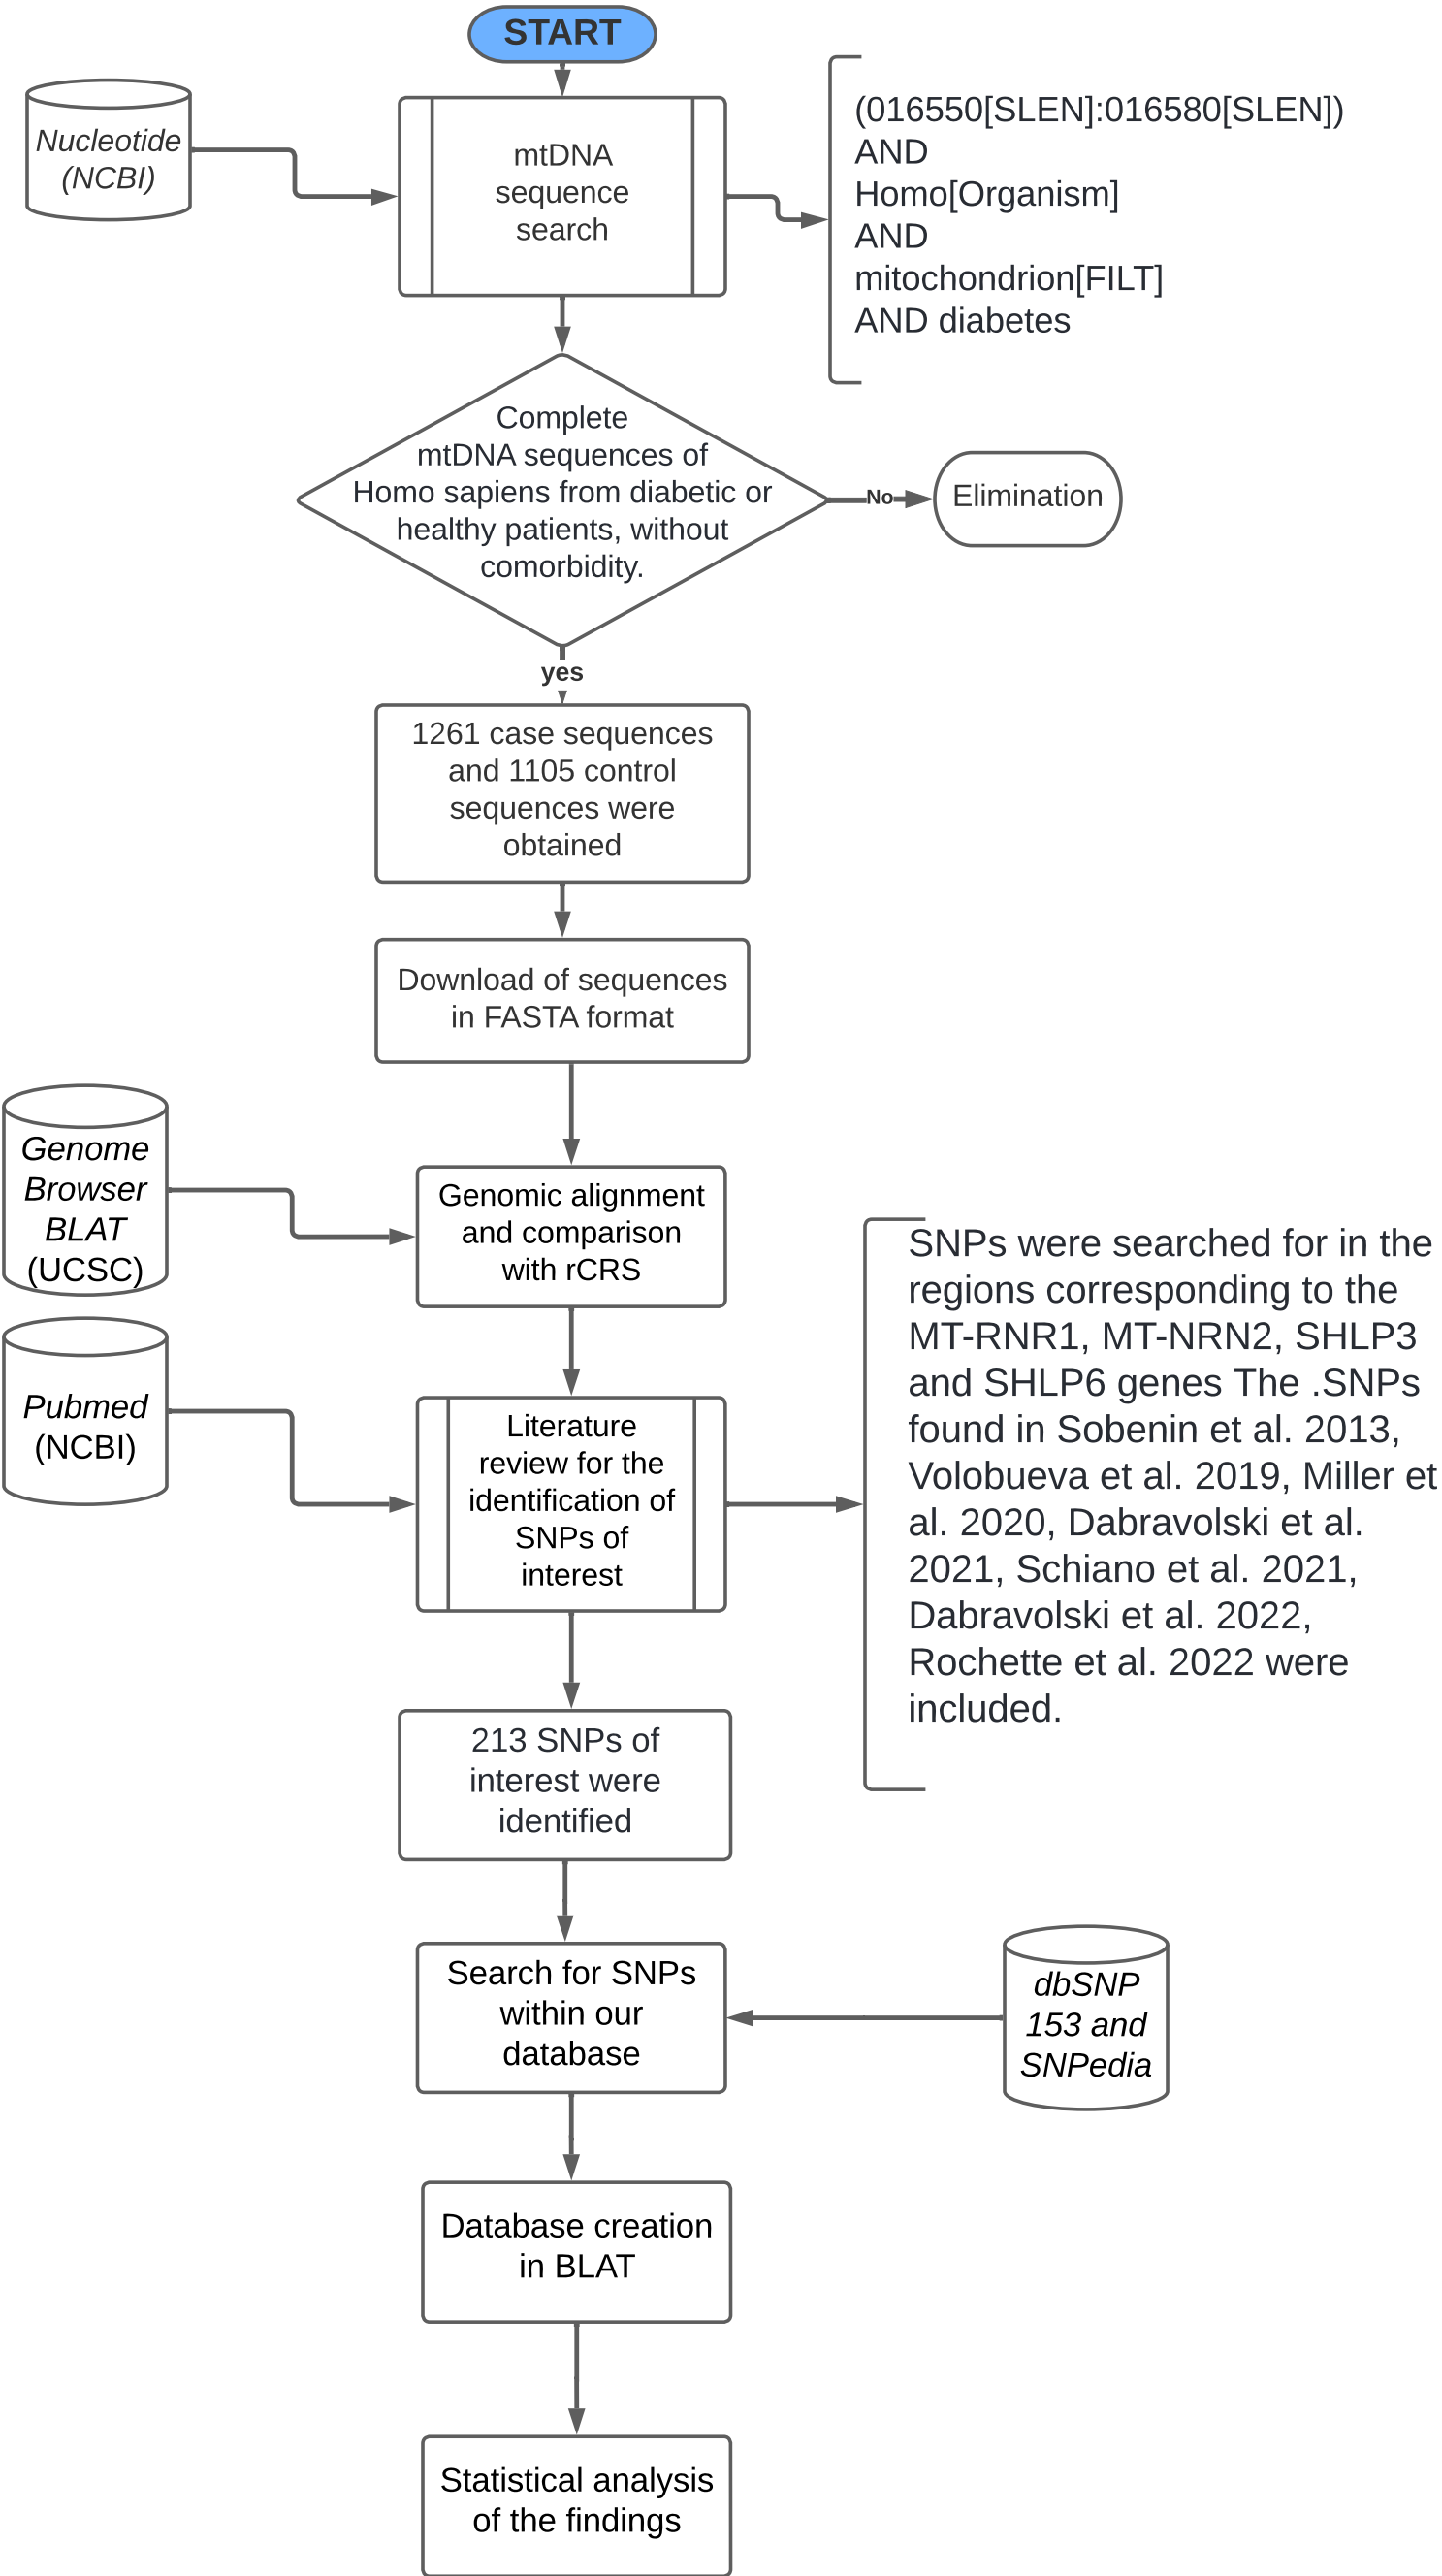

Supplement: Supplementary file 1 [file supplementary]
